# Supplementary material
Source: MDPI journal article supplement (https://www.mdpi.com/1099-4300/19/6/265)

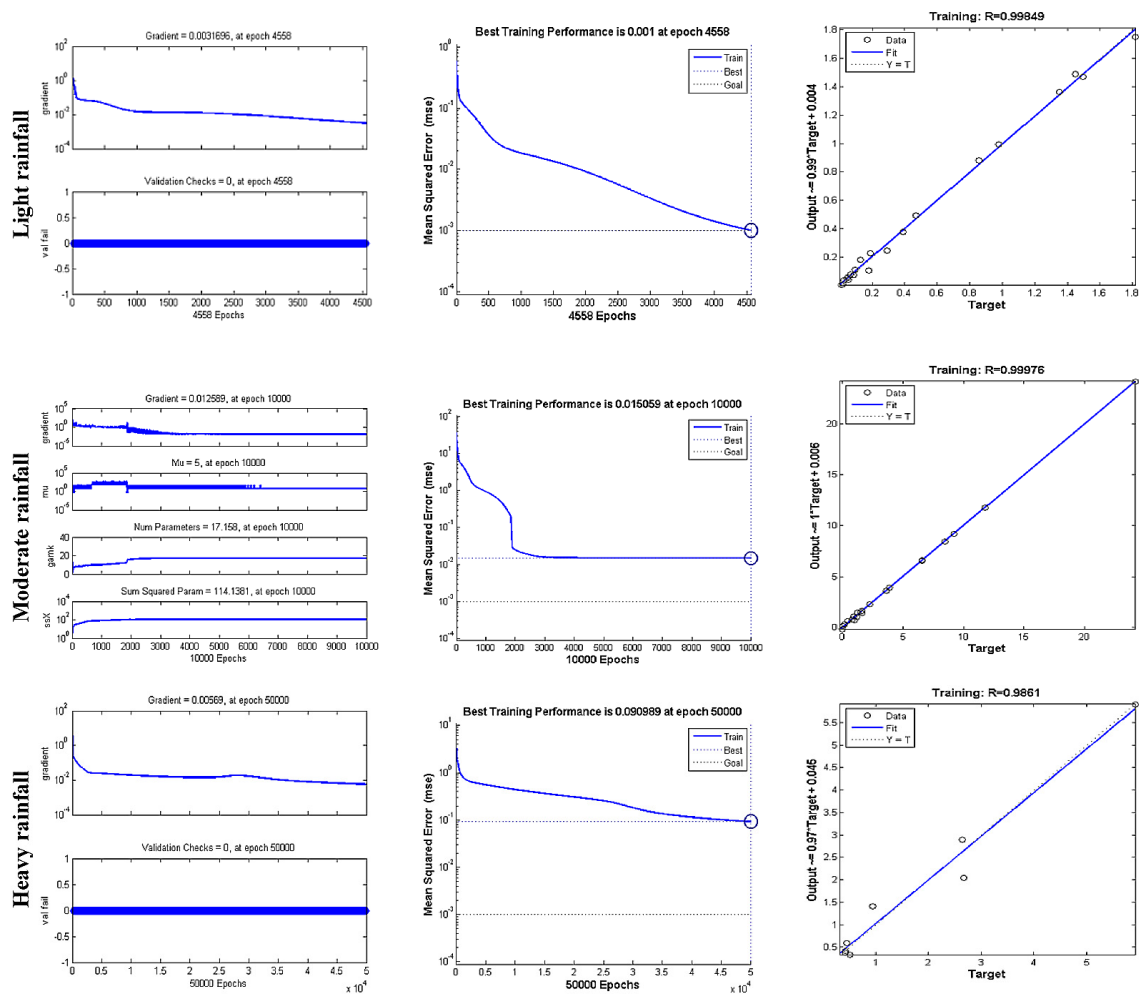

(a)

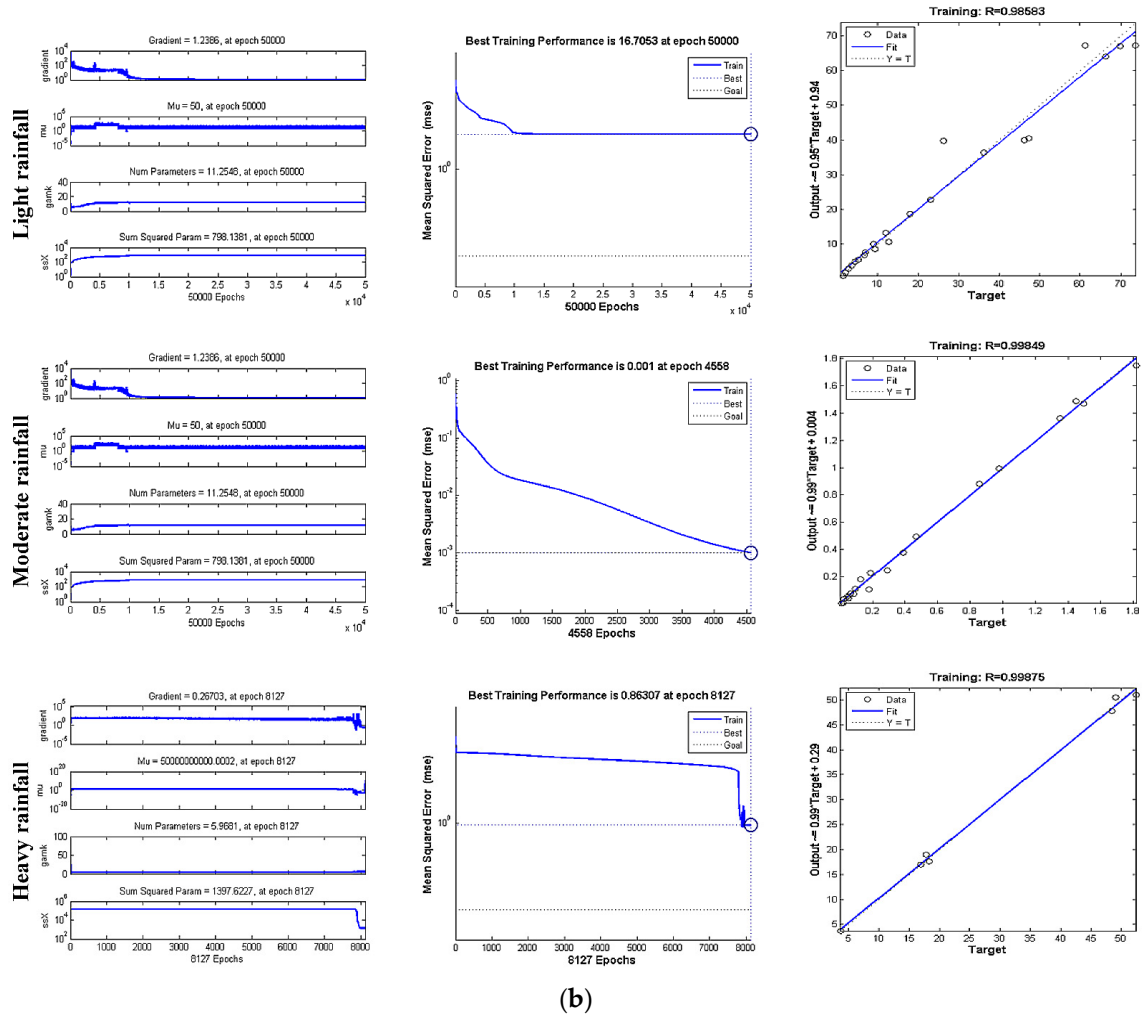

**Figure S1.** Training results of the loads in the different rainfall patterns. (a) NPS-TN; (b) NPS-TP.

Supplement: s1 [file s1]
